# Supplementary material for: Design, Synthesis, and Characterization of Schiff Base Bond-Linked pH-Responsive Doxorubicin Prodrug Based on Functionalized mPEG-PCL for Targeted Cancer Therapy
Source: MDPI journal article supplement (doi:10.3390/polym10101127), 2018-10-11
Supplement: s1 [file s1]

# Supplementary Materials

## Design, Synthesis, and Characterization of Schiff Base Bond-Linked pH-Responsive Doxorubicin Prodrug Based on Functionalized mPEG-PCL for Targeted Cancer Therapy

Yinglei Zhai <sup>1,†</sup>, Xing Zhou <sup>2,†</sup>, Zhiqiang Zhang <sup>3</sup>, Lei Zhang <sup>4</sup>, Dianyu Wang <sup>1</sup>, Xinhui Wang <sup>1</sup>, Wei Sun <sup>1,\*</sup>

<sup>1</sup> Department of Biomedical Engineering, School of Medical Devices, Shenyang Pharmaceutical University, Shenyang 110016, China; yingleizhai@sypu.edu.cn (Y.Z.); wdy545820@163.com (D.W.); m15141210344@163.com (X.W.)

<sup>2</sup> Hainan Institute of Materia Medica, Haikou 570311, China; beyondyme@163.com

<sup>3</sup> Department of Pharmaceutics, School of Pharmacy, Shenyang Pharmaceutical University, Shenyang 110016, China; zifeiyuxq@163.com

<sup>4</sup> Shanghai Pharma Group (Benxi) Northern Pharmaceutical Co., Ltd, Benxi 117004, China; zl.719@163.com

\* Correspondence: sunwei@sypu.edu.cn or sunwei19801208@163.com

† These two authors contributed equally to this work.

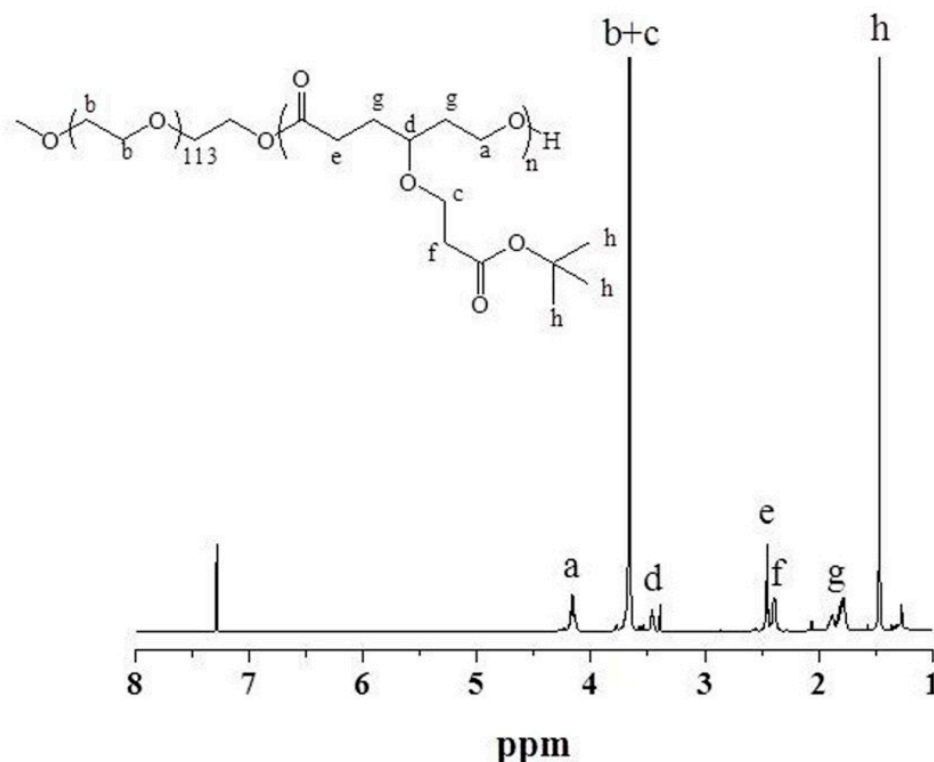

Figure S1. <sup>1</sup>H NMR spectrum of mPEG-BuPCL Block Copolymer.

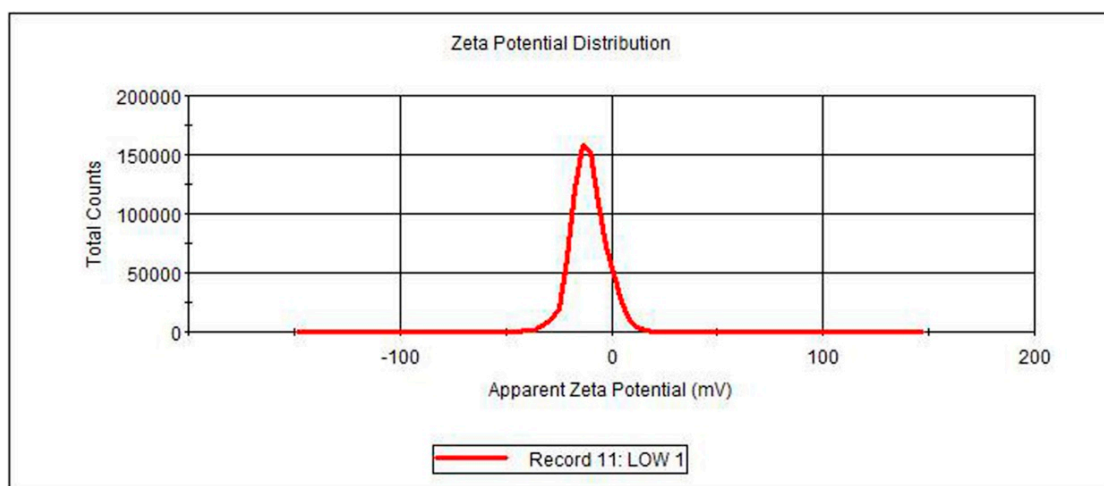

**Figure S2.** Zeta potential of mPEG-PCL-Imi-DOX Micelles.
